# Supplementary material for: T cells accumulate in non-diabetic islets during ageing
Source: Springer Nature journal article supplement (doi:10.1186/s12979-021-00221-4), 2021-02-23
Supplement: MOESM1 [file 18895498]

**Supplemental Table 1. Antibodies for flow cytometry**

| <b>Target</b>       | <b>Clone</b> | <b>Catalogue</b> | <b>Dilution</b> |
|---------------------|--------------|------------------|-----------------|
| <b>Mouse islets</b> |              |                  |                 |
| <b>CD45</b>         | 30-F11       | 48-0451-82       | 1:100           |
| <b>CD19</b>         | eBio1D3      | 17-0193-82       | 1:100           |
| <b>CD5</b>          | 53-7.3       | 11-0051-82       | 1:150           |
| <b>CD11b</b>        | M1/70        | 12-0112-82       | 1:100           |
| <b>CD3</b>          | 17A2         | 564009           | 1:100           |
| <b>CD4</b>          | GK1.5        | 100453           | 1:100           |
| <b>CD3e</b>         | 145-2C11     | 25-0031-82       | 1:25            |
| <b>CD8a</b>         | 53-6.7       | 100761           | 1:100           |
| <b>FoxP3</b>        | FJK-16s      | 11-5773-82       | 1:25            |
| <b>TCR b</b>        | H57-597      | 109212           | 1:100           |
| <b>TCR gd</b>       | GL3          | 118108           | 1:100           |
| <b>NK1.1</b>        | PK136        | 108714           | 1:100           |
| <b>Human islets</b> |              |                  |                 |
| <b>CD45</b>         | HI30         | 48-0459-42       | 1:15            |
| <b>CD3</b>          | UCHT1        | 17-0038-42       | 1:20            |

**Supplemental Table 2. Human islet donor characteristics.**

| Islet preparation                                                                             | 1                                     | 2                                     | 3                                     |
|-----------------------------------------------------------------------------------------------|---------------------------------------|---------------------------------------|---------------------------------------|
| <b>Donor demographics</b>                                                                     |                                       |                                       |                                       |
| <b>Unique identifier</b>                                                                      | R310                                  | R314                                  | R317                                  |
| <b>Age (years)</b>                                                                            | 25                                    | 31                                    | 54                                    |
| <b>Sex (M/F)</b>                                                                              | M                                     | F                                     | M                                     |
| <b>BMI (kg/m<sup>2</sup>)</b>                                                                 | 26.4                                  | 30.3                                  | 26.4                                  |
| <b>HbA<sub>1c</sub></b>                                                                       | 5.4                                   | 5.0                                   | 5.1                                   |
| <b>Cause of death</b>                                                                         | NDD-neurological                      | NDD-neurological                      | NDD-neurological                      |
| <b>Diabetes? (Y/N)</b>                                                                        | N                                     | N                                     | N                                     |
| <b>Pancreas</b>                                                                               |                                       |                                       |                                       |
| <b>Origin/source</b>                                                                          | Alberta Diabetes Institute Islet Core | Alberta Diabetes Institute Islet Core | Alberta Diabetes Institute Islet Core |
| <b>Cold ischaemia time (h)</b>                                                                | 11.25                                 | 14.75                                 | 21                                    |
| <b>Islet handling and use</b>                                                                 |                                       |                                       |                                       |
| <b>Origin/source</b>                                                                          | Alberta Diabetes Institute Islet Core | Alberta Diabetes Institute Islet Core | Alberta Diabetes Institute Islet Core |
| <b>Isolation centre</b>                                                                       | Alberta Diabetes Institute Islet Core | Alberta Diabetes Institute Islet Core | Alberta Diabetes Institute Islet Core |
| <b>Estimated purity (%)</b>                                                                   | 90                                    | 80                                    | 90                                    |
| <b>Total culture time (h)</b>                                                                 | ~96                                   | ~48                                   | ~96                                   |
| <b>Functional measurement (Stimulation index mean 10 mM to 1 mM)</b>                          | 14.07                                 | 3.62                                  | 11.9                                  |
| <b>Experimental islet use (including in which experiment each islet preparation was used)</b> | Islet dispersion and flow cytometry   | Islet dispersion and flow cytometry   | Islet dispersion and flow cytometry   |

This table was prepared following recommendations as per: Hart N.J., Powers A.C. 2019. Use of human islets to understand islet biology and diabetes: progress, challenges and suggestions. *Diabetologia* 62:212–222. Open source data on each islet preparation can be obtained at [www.isletcore.ca](http://www.isletcore.ca).

**A** 10 months - islets

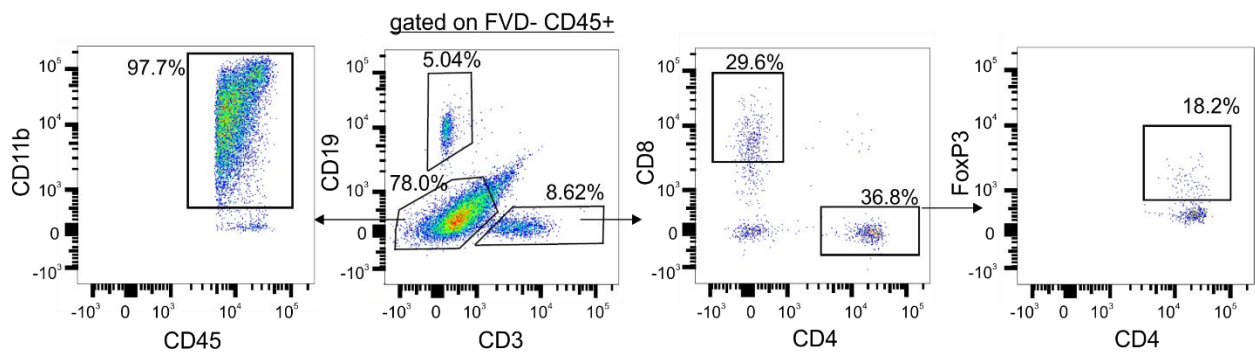

**B** 10 months - spleen

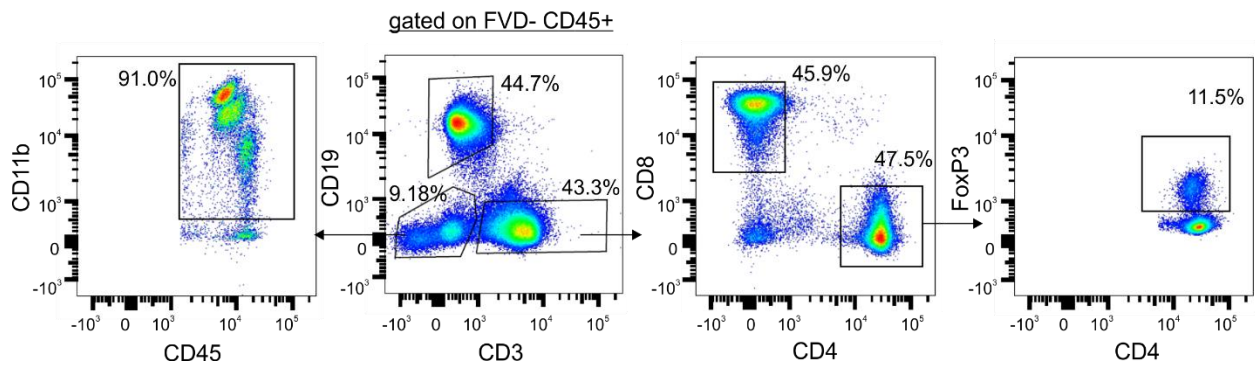

**Supplemental Figure 1. T cell subsets in 10 month-old mice.** Islets (A) and spleens (B) were isolated from 10-month old mice for analysis of islet T cell subsets by flow cytometry. Cells were gated on FSC, SSC, viability (FVD-) and CD45+, and subsequently CD19, CD3, CD11b, CD8, CD4, and FoxP3; data are representative of 2 samples, (for islet samples, islets from 10 mice pooled per sample).

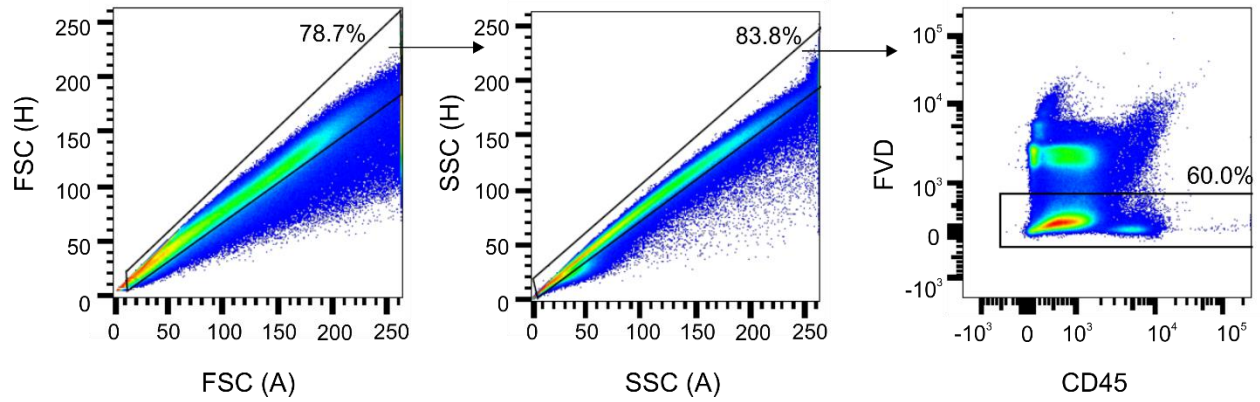

**Supplemental Figure 2.** Representative data from human islet preparations, dispersed and gated on FSC, SSC and viability (FVD-). FACS plots are representative of 3 independent biological samples. Numbers in FACS plots represent the percent of cells in each selection as a function of the parent population.
